## Effects of Halothane and Isoflurane on Calcium and Potassium Channel Currents in Canine Coronary Arterial Cells

Nediljka Buljubasic, M.D.,\* Nancy J. Rusch, Ph.D.,† Jure Marijic, M.D.,\*  
John P. Kampine, M.D., Ph.D.,‡ Zeljko J. Bosnjak, Ph.D.§

The effects of halothane (0.75% and 1.5%) and isoflurane (2.6%) on macroscopic  $\text{Ca}^{2+}$  and  $\text{K}^+$  channel currents ( $I_{\text{Ca}}$  and  $I_{\text{K}}$ , respectively) were investigated in voltage-clamped vascular muscle cells from the canine coronary artery. Single coronary arterial cells were dialyzed with  $\text{K}^+$  glutamate solution and superfused with Tyrode's solution for measurement of  $I_{\text{K}}$  ( $n = 45$ ). Stepwise depolarization from a holding potential of  $-60$  mV to beyond  $-30$  mV elicited an outward, slowly inactivating  $I_{\text{K}}$  that had a macroscopic slope conductance of 18 nS.  $I_{\text{K}}$  was reduced 75% by 10 mM 4-aminopyridine, a  $\text{K}^+$  channel antagonist. Compared to 4-aminopyridine, halothane at 0.75% and 1.5% reduced peak  $I_{\text{K}}$  amplitude only by  $14 \pm 2\%$  and  $36 \pm 3\%$ , respectively. At approximately equianesthetic concentrations, 2.6% isoflurane suppressed  $I_{\text{K}}$  less than did 1.5% halothane, reducing peak amplitude by  $15 \pm 3\%$ . In other sets of experiments, cells were dialyzed with 120  $\text{Cs}^+$ -glutamate solution and superfused with 10 mM  $\text{BaCl}_2$  or  $\text{CaCl}_2$  solutions to isolate  $I_{\text{Ca}}$  ( $n = 39$ ) pharmacologically. Under these conditions, progressive depolarizing steps from  $-60$  mV elicited a small inward current, which was potentiated 3.4-fold by equimolar substitution of  $\text{Ba}^{2+}$  for  $\text{Ca}^{2+}$  in the external solution and was blocked by 1  $\mu\text{M}$  nifedipine. This inward current, which resembled L-type  $I_{\text{Ca}}$ , was blocked  $37 \pm 4\%$  and  $70 \pm 4\%$  in the presence of 0.75% and 1.5% halothane, respectively. Isoflurane (2.6%) also decreased  $I_{\text{Ca}}$  by  $55 \pm 5\%$ . It appears that while halothane and isoflurane suppress both  $I_{\text{K}}$  and  $I_{\text{Ca}}$ , these anesthetics preferentially reduce  $I_{\text{Ca}}$ . Also, at equianesthetic concentrations, halothane (1.5%) appears more potent than isoflurane (2.6%) in suppressing ionic currents in the coronary arterial cells. The significantly greater suppression of  $I_{\text{K}}$  and  $I_{\text{Ca}}$  by 1.5% halothane than 2.6% isoflurane may contribute to the more predominant halothane-induced coronary dilation by halothane. Thus, in the coronary artery, which relies on  $\text{Ca}^{2+}$  entry for vascular muscle activation, the reduced  $\text{Ca}^{2+}$  influx may represent one of the mechanisms by which volatile anesthetics induce vasodilation. (Key words: Anesthetics, volatile: halothane; isoflurane. Animal: dog. Artery: coronary. Current: calcium; potassium. Muscle: Vascular smooth.)

THE EFFECTS of halothane and isoflurane on vascular muscle have been examined in a number of studies. The general conclusion is that these anesthetics cause vasodi-

lation in specific vascular beds either by a direct depressant action on vascular smooth muscle<sup>1,2</sup> or by an indirect attenuation of vasoconstrictor activity.<sup>3-6</sup> Although it is frequently contended that isoflurane is a more potent coronary vasodilator than halothane in the isolated perfused heart, isoflurane was a less potent dilator of isolated coronary arterial segments.<sup>7</sup> This suggests that in the intact system the direct effect of volatile anesthetics on coronary arterial muscle likely interact with other mechanisms to determine the final level of vascular activation.

In support of this, the mechanisms of volatile anesthetic-induced changes in the vasculature appear to be diverse. Volatile anesthetics reportedly alter sympathetic neurotransmission, thus changing the central vasoconstricting influence on the vasculature.<sup>8</sup> At the vascular neuromuscular junction, receptor-mediated contractile responses are reportedly suppressed.<sup>4,6,9</sup> The known effects of halothane on sarcoplasmic reticulum include increasing  $\text{Ca}^{2+}$  release and decreasing  $\text{Ca}^{2+}$  accumulation,<sup>10</sup> possibly by inhibiting  $\text{Ca}^{2+}$  ATPase activity, as has been shown in isolated cardiac sarcoplasmic reticulum.<sup>11</sup> Halothane also may directly decrease  $\text{Ca}^{2+}$  activation of the contractile proteins<sup>10</sup> and increase intracellular levels of cAMP<sup>1,12</sup> and cGMP.<sup>13</sup> Involvement of the endothelium in volatile anesthetic-induced changes in the vasculature is controversial at present.<sup>14-16</sup>

Despite the available literature, the actions of volatile anesthetics on the electrical properties of vascular muscle are largely unknown. Ionic transsarcolemmal fluxes, a potentially very important site of anesthetic action, have not been intensively studied in vascular smooth muscle. It appears, however, that the dilation induced by halothane of vital vascular beds, such as the cerebral circulation, involves a direct action of halothane on the vascular muscle membrane.<sup>17</sup> In isolated cerebral arteries, relaxation by halothane is associated with concentration-dependent membrane depolarization.<sup>17</sup> The mechanism by which halothane induces this apparent electromechanical uncoupling, *i.e.*, causes membrane depolarization concurrent with vasodilation of vascular muscle cells, is not known.

It was shown recently that halothane and isoflurane suppress membrane  $\text{Ca}^{2+}$  and  $\text{K}^+$  channel currents in cardiac myocytes.<sup>18,19</sup> However, no reports are available on the effects of inhalational anesthetics on the above currents in vascular muscle cells. Thus, the purpose of this

\* Visiting Scientist, Department of Anesthesiology.

† Assistant Professor, Department of Physiology.

‡ Professor and Chairman, Department of Anesthesiology; Professor of Physiology.

§ Professor, Departments of Anesthesiology and Physiology.

Received from the Departments of Anesthesiology and Physiology, The Medical College of Wisconsin, Milwaukee, Wisconsin. Accepted for publication January 31, 1992. Supported in part by National Institutes of Health grants HL 01901 and HL 39776 (ZJB), Anesthesiology training grant GM08377, and American Heart Association, Wisconsin Affiliate, GIA #89-GA-02 (NJR).

Address reprint requests to Dr. Bosnjak: Medical College of Wisconsin, MFRC, Room A1000, 8701 Watertown Plank Road, Milwaukee, Wisconsin 53226.

study was to use the voltage-clamp method to directly measure the effects of halothane and isoflurane on  $K^+$  and  $Ca^{2+}$  channel currents ( $I_K$  and  $I_{Ca}$ , respectively) in canine coronary arterial cells. Our results show that halothane and isoflurane decrease the amplitudes of both  $I_K$  and  $I_{Ca}$  but preferentially suppress  $I_{Ca}$  amplitude. Halothane was a more potent depressor of these currents than was isoflurane. Because  $K^+$  channel block would favor membrane depolarization, whereas  $I_{Ca}$  suppression would induce vascular dilation, these anesthetic-induced effects on the vascular muscle membrane may help to explain the electromechanical uncoupling of vascular smooth muscle by inhalational anesthetic agents. The preferential depression by halothane and isoflurane of  $I_{Ca}$  amplitude also may contribute to coronary dilatation.

### Materials and Methods

#### PREPARATION OF SINGLE VASCULAR MUSCLE CELLS

After the approval by the Institutional Animal Care Committee, adult mongrel dogs weighing 15–25 kg were placed in a Plexiglas box and anesthetized with halothane. After attainment of surgical anesthesia, the trachea was intubated and the lungs were ventilated with 1.5% halothane in oxygen. The chest was opened, and the hearts were excised rapidly and placed in cold oxygenated Krebs' solution. The left anterior descending and/or left circumflex coronary arteries were dissected free from the epicardial surface and placed in a chamber containing Krebs' solution. Any remaining blood was cleared from the arteries, excess fat and adventitia removed, and the arteries cut into 2-mm rings. These were placed in an enzyme solution containing (in millimolar concentration): NaCl 136, KCl 6,  $MgCl_2$  1, HEPES 10,  $CaCl_2$  0.5, glucose 10, collagenase CLS II 500 U/ml (Worthington Co., Freehold, NJ), dithiothreitol 4 mM (Sigma Chemical Co., St. Louis, MO), and papain 2 U/ml (Worthington Co.).

The vascular rings were placed in a vial containing the enzyme solution, maintained at 37° C in a water bath, and stirred at 5 rpm by a microstirrer (Micro-Stir, Wheaton Instruments, Millville, NJ). After 1–2 h, the vascular pieces were disrupted mechanically by forcing them repeatedly through a Pasteur's pipette. The cell suspension was pelleted by centrifugation at 120 × g for 8 min. The pellet was resuspended in enzyme-free solution and placed on ice. Experiments were initiated immediately.

#### VOLTAGE-CLAMP RECORDING

A drop of dispersed single coronary arterial cells was placed in a perfusion chamber (22° C) on the stage of an inverted microscope (Olympus IMT-2, Leeds Instruments, Minneapolis, MN) equipped with modulation con-

trast. At 500× magnification, a hydraulic micromanipulator (Narishige, Tokyo, Japan) was used to position heat-polished borosilicate patch pipettes with tip resistances of 4–6 MΩ on the membrane of arterial cells. High resistance seals (3–30 GΩ) were formed, after which the pipette patch was removed by negative pressure to obtain the electrical access to the whole cell as previously described.<sup>20</sup> Whole-cell currents were elicited by 200-ms depolarizing pulses generated by a computerized system (Pclamp software, Axon Instruments, Burlingame, CA) every 5–10 s. The currents were amplified by a List EPC-7 patch-clamp amplifier (Adams & List Assoc., Great Neck, NY), and the amplifier output was low-pass-filtered at 500 Hz. All data were digitized (sampling rate 10,000 per second) and stored on a hard disk to permit analysis at a later time. Leak and capacitative currents were subtracted from each record by linearly summing scaled currents obtained during 10-mV hyperpolarizing pulses.

#### RECORDING SOLUTIONS

The external solution used for the measurement of  $I_K$  contained (in millimolar concentration):  $CaCl_2$  2, NaCl 135, KCl 4.7,  $MgCl_2$  1, glucose 10, and HEPES 5 (pH = 7.4). The pipette solution contained (in millimolar concentration): K-glutamate 130,  $MgCl_2$  1, EGTA 1, HEPES 10, and  $Na_2ATP$  3 (pH = 7.1–7.2). The external solution used for  $I_{Ca}$  measurement consisted of (in millimolar concentration):  $CaCl_2$  or  $BaCl_2$  10, tetraethylammonium chloride 135,  $MgCl_2$  1, glucose 10, and HEPES 10 (pH = 7.4). In the pipette solution,  $Cs^+$  was substituted for  $K^+$  to eliminate  $I_K$  and permit isolated measurement of  $I_{Ca}$ .

#### DRUG EFFECTS

Repetitive current–voltage curves were obtained in control solutions to monitor time-dependent changes in  $I_K$ . After steady-state current amplitude was established by repetitive measurements, cells were exposed to 1 MAC (0.75%) of halothane, 2 MAC (1.5%) of halothane, or 2 MAC (2.6%) of isoflurane by changing the inflow perfusate to one containing anesthetic. Measurements using other drugs were performed similarly. Effects of halothane and isoflurane were complete within 2 min and were reversible during  $I_K$  measurements. This was verified by obtaining similar measurements following removal of anesthetic from the perfusate. Contrary to the effects on  $I_K$ , anesthetic-induced changes of  $I_{Ca}$  were longer-lasting. Thus, after two control measurements of  $I_{Ca}$  amplitude, a third measurement was obtained after a 3-min exposure to halothane or isoflurane. Parallel time control measurements were taken over the same time period in the absence of anesthetics. Halothane was solubilized at final bath concentrations of  $0.4 \pm 0.01$  mM and  $0.8 \pm 0.01$

mM, which were calculated to correspond to 0.75% and 1.5% halothane, respectively. The isoflurane concentration of  $1.0 \pm 0.02$  mM was calculated to correspond to 2.6%. Solution was sampled from the perfusion chamber and analyzed by gas chromatography to verify the anesthetic concentration at the cell proximity.

Nifedipine (Sigma, St. Louis, MO) was dissolved in 70% ethanol to make a 1 mM stock solution. The final concentration of solvent in the recording solution was 0.07% and by itself did not have any effect of the current. 4-Aminopyridine (4-AP, Sigma, St. Louis, MO) was dissolved directly in the recording solutions.

#### STATISTICAL ANALYSIS

All currents are expressed as mean  $\pm$  SEM and were analyzed by two-way analysis of variance. If the *F* test showed significance, Fisher's test for least significant difference was performed, with the level of significance at  $P \leq 0.05$ .

### Results

#### POTASSIUM CURRENT

Cells dialyzed with high  $K^+$  solution showed large outward currents during 200-ms depolarizing steps from a holding potential of  $-60$  mV to potentials beyond  $-30$  mV (fig. 1A). Activation of peak outward current was linear between  $-20$  and  $+40$  mV, with an average macroscopic slope conductance of 18 nS (fig. 1B). This current

was eliminated when  $Cs^+$  was substituted for  $K^+$  in the pipette solution, indicating that  $K^+$  was the mandatory charge carrier for this current. During 200-ms depolarizing pulses from  $-60$  mV to consecutively less negative voltages, the amplitude of outward  $K^+$  current was largely sustained over time. This is illustrated by comparing the current-voltage relationship for peak  $I_K$ , with  $I_K$  amplitude measured at the end of the 200-ms depolarizing pulse (fig. 1B). At any given voltage, the mean peak and remaining  $I_K$  values were the same, suggesting that  $I_K$  inactivation over the 200-ms pulse period was insignificant. For example, peak  $I_K$  elicited by depolarization to  $+40$  mV from a holding potential of  $-60$  mV averaged  $1169 \pm 202$  pA, of which  $1058 \pm 196$  pA (91%) remained at the end of a 200-ms pulse. Outward current never showed the transient, rapidly inactivating component that has been seen in other smooth muscle preparations.<sup>21,22</sup> Instead, when the duration of the depolarizing pulse was increased to 5 s to discern better the time course of  $I_K$  decay, only a single slow-decay phase was observed (fig. 1C).

4-AP was a potent antagonist of the voltage-dependent  $I_K$ . Concentrations of 0.1, 1, and 10 mM 4-AP caused dose-dependent depression of macroscopic  $I_K$ , as illustrated in one coronary arterial cell (fig. 2A). Figure 2B illustrates the average effect of 4-AP on the current-voltage relationship for  $K^+$  channel activation in six cells. In a dose-dependent manner, 4-AP reduced  $I_K$  amplitude elicited by 10-mV steps from  $-60$  mV to  $+40$  mV. Peak  $I_K$  elicited by a voltage step to  $+40$  mV was reduced to

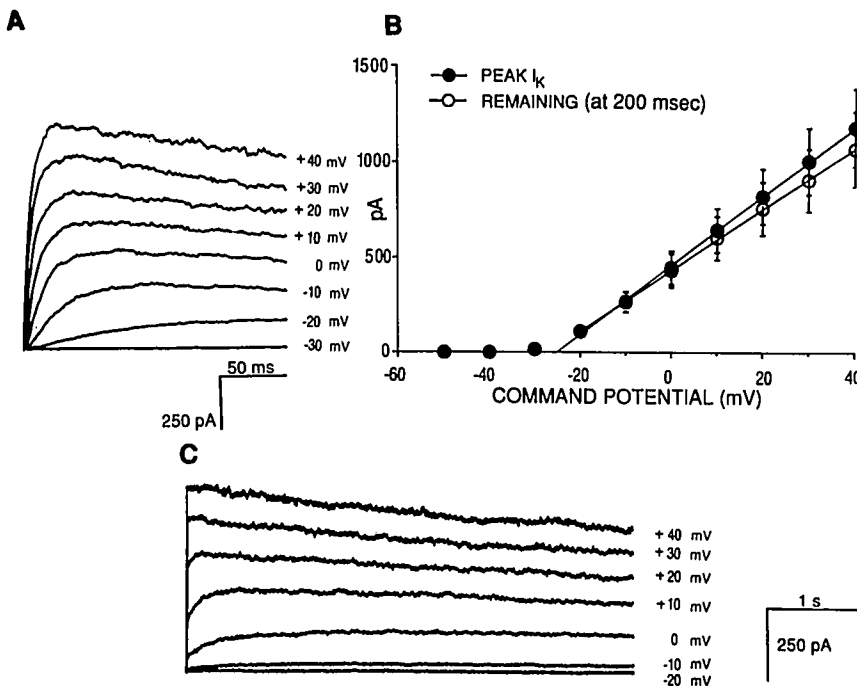

FIG. 1. Voltage and time-dependent activation and decay of outward  $K^+$  current ( $I_K$ ) in a single cell (A). The cell was depolarized in 10-mV increments from holding potential of  $-60$  mV to voltages of up to  $+40$  mV. In this cell,  $I_K$  was activated at command potentials positive to  $-30$  mV. The current-voltage plot of  $I_K$  in coronary smooth muscle cells compares peak  $I_K$  and  $I_K$  remaining at 200 ms against command potential in 5 cells (B). Time-dependent decay in  $I_K$  in a single cell depolarized to different command potentials for 5 s is also shown (C).

FIG. 2. In a dose-dependent manner, increasing concentrations of 4-aminopyridine (4-AP) (0.1, 1, and 10 mM) decreased outward  $K^+$  current ( $I_K$ ) elicited by depolarizing pulses from a holding potential of  $-60$  to  $+40$  mV in one cell (A). The control current-voltage relationship ( $n = 6$ ) for activation of  $I_K$  (expressed as fraction of control maximal  $I_K$  obtained by depolarization to  $+40$  mV) was reduced in a dose-dependent manner by 0.1, 1, and 10 mM 4-AP throughout the entire voltage range studied (B). Standard error bars are less than symbol size for some measurements.  $*P \leq 0.05$  versus control.

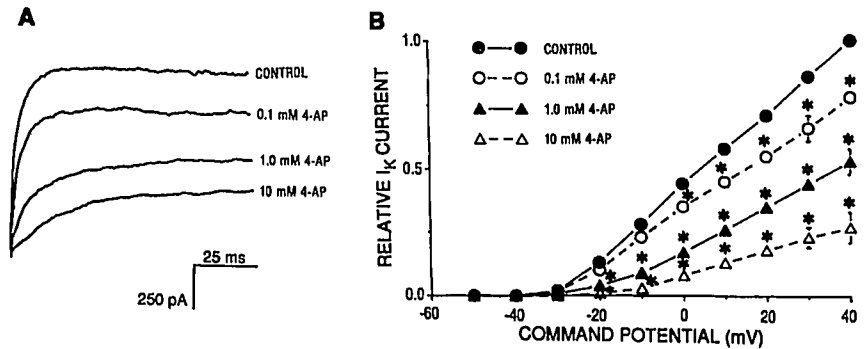

$73 \pm 6\%$ ,  $49 \pm 5\%$ , and  $25 \pm 6\%$  of control amplitude by 0.1, 1, and 10 mM 4-AP, respectively.

The effects of halothane and isoflurane on whole-cell  $I_K$  were determined by applying a series of stepwise (10 mV) depolarizing test pulses from a holding potential of  $-60$  mV to positive potentials as high as  $+40$  mV. Figure 3 shows actual traces of patch-clamp recordings illustrating the depressant effect of 0.75% and 1.5% halothane and 2.6% isoflurane on  $I_K$  amplitude. Halothane caused a reversible, dose-dependent reduction in  $I_K$  at all voltages. Isoflurane similarly induced a reversible suppression of  $I_K$ . Peak  $I_K$  was plotted as a function of membrane potential to analyze the mean effect of 0.75% and 1.5% halothane (figs. 4A and 4B, respectively) and 2.6% isoflurane (fig. 4C) on  $I_K$  amplitude. Halothane at concentrations of 0.75% and 1.5% depressed peak  $I_K$  amplitude obtained at  $+40$  mV by  $14.4 \pm 2\%$  and  $36.4 \pm 3\%$ , respectively ( $n = 7$ ). Isoflurane (2.6%) reduced  $I_K$  amplitude by  $15 \pm 3\%$  ( $n = 8$ ). At approximately equianesthetic concentrations,  $I_K$  suppression by 1.5% halothane was

significantly greater than by 2.6% isoflurane at voltages positive to  $+10$  mV.

### CALCIUM CURRENT

Whole-cell  $I_{Ca}$  was pharmacologically isolated for measurement by substituting  $Cs^+$  for  $K^+$  in the pipette solution and tetraethylammonium chloride for  $Na^+$  and  $K^+$  in the external solution, as described previously.<sup>23</sup>  $I_{Ca}$  was generated by stepwise depolarizing pulses (10 mV; 200 ms) from a holding potential of  $-60$  mV to command potentials as high as  $+40$  mV. The concentration of extracellular  $Ca^{2+}$  was increased from 2 to 10 mM to enhance  $I_{Ca}$  amplitude and facilitate the accurate measurement of otherwise relatively small inward current. Furthermore, substitution of 10 mM barium ( $Ba^{2+}$ ) for 10 mM  $Ca^{2+}$  in the external solution increased peak  $I_{Ca}$  at  $+40$  mV by  $3.4 \pm 0.6$ -fold, as shown in an example (fig. 5A). All further experiments were done with 10 mM  $Ba^{2+}$  in the external solution. In 33 cells, threshold activation occurred

FIG. 3. Actual recordings showing the effect in different cells of 0.75% halothane (top), 1.5% halothane (middle), and 2.6% isoflurane (bottom) on  $K^+$  current elicited by progressive 10-mV test pulses from  $-60$  mV to  $+40$  mV. Recordings were obtained before (control 1), during (anesthetic), and after (control 2) exposure to volatile anesthetics. Both anesthetics produced significant depression of  $K^+$  current, which was completely reversible on washout (control 2). Effects of halothane were dose-dependent.

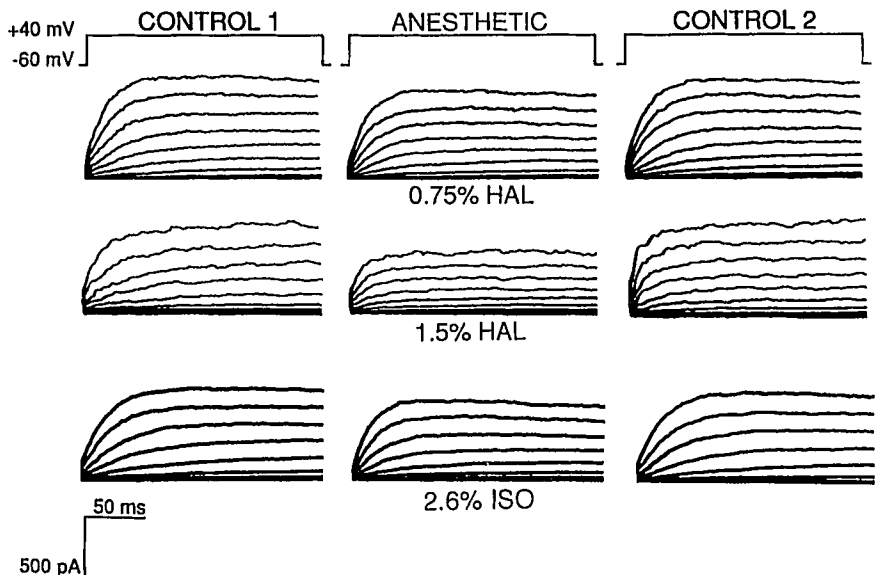

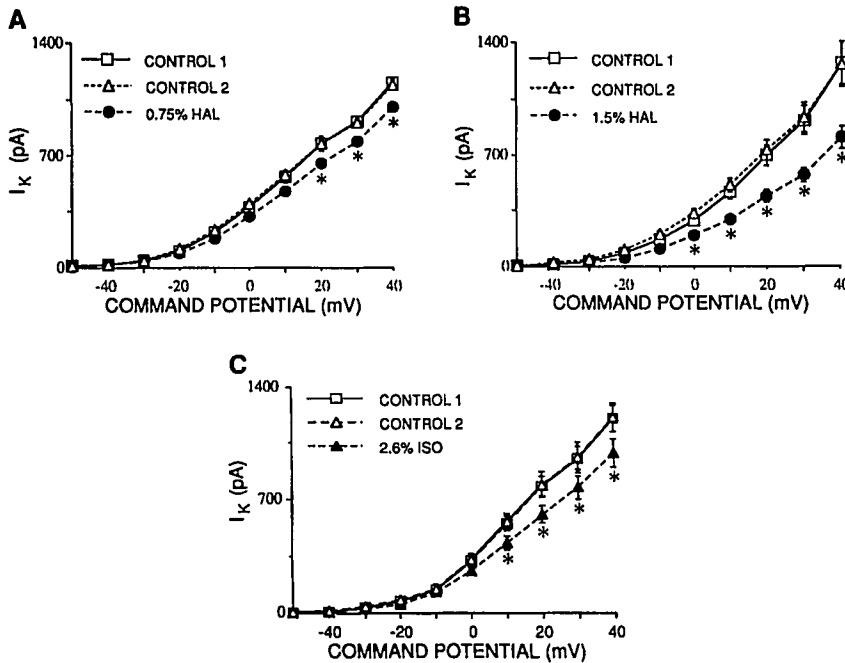

FIG. 4. The current-voltage relationship for  $K^+$  current ( $I_K$ ) activation in control solution and in the presence of 0.75% halothane (A,  $n = 7$ ), 1.5% halothane (B,  $n = 7$ ), and 2.6% isoflurane (C,  $n = 8$ ). Halothane depressed  $I_K$  amplitude in a dose-dependent fashion throughout the entire voltage range studied. Isoflurane also depressed  $I_K$  amplitude at all potentials, with the magnitude of depression being similar to that of 0.75% halothane. \* $P \leq 0.05$  versus control 1 and control 2.

at  $-10$  mV, and the maximal activation was reached at  $+20$  mV (fig. 5B). Maximal  $I_{Ca}$  varied greatly between cells (range 15–170 pA) and averaged  $106 \pm 20$  pA.

The effect of nifedipine on  $I_{Ca}$  was measured using the same pulse protocol to further characterize the channel pathway for inward current. As illustrated in the recording in figure 5C, addition of  $1 \mu M$  nifedipine to bath solution containing 10 mM  $Ba^{2+}$  reduced  $I_{Ca}$  to  $12 \pm 1\%$  of original amplitude ( $n = 5$ ). Both  $Ba^{2+}$  and nifedipine are more selective for the long-lasting (L-type)  $Ca^{2+}$  channel, the former being a preferential charge carrier and the latter a specific blocker of this channel.<sup>24</sup>

Figure 6 shows four examples of three consecutive recordings, 3 min apart, of  $I_{Ca}$  elicited from a holding potential of  $-60$  mV. Traces at the top show three sequential control recordings in the absence of anesthetic agents. Two initial control recordings (controls 1 and 2) at 3-min intervals preceded subsequent administration of 0.75% and 1.5% halothane, respectively (figs. 6B and 6C). Figure 6D shows the effect of 2.6% isoflurane on  $I_{Ca}$  elicited by the same pulse protocol. Halothane (0.75% and 1.5%) depressed  $I_{Ca}$  in a dose-dependent manner throughout the voltage range studied, and isoflurane had a qualitatively similar action. The effects of halothane, and to a lesser degree isoflurane, on  $I_{Ca}$  were long-lasting, and  $I_{Ca}$  amplitude did not recover even after 15 min. Because of the slow recovery of  $I_{Ca}$  after exposure to volatile anesthetics, a series of control measurements was taken in a separate group of cells during the same time period to quantify time-dependent changes in  $I_{Ca}$ . As shown by the single recording in figure 6A, and for mean values in

figure 7A, the current-voltage relationship for the activation of  $I_{Ca}$  was the same for three consecutive controls (control 1 =  $107 \pm 32$  pA, control 2 =  $113 \pm 37$  pA, and control 3 =  $101 \pm 29$  pA;  $n = 8$ ). However, figures 7B and 7C show that 0.75% halothane decreased  $I_{Ca}$  by  $37 \pm 4\%$  from a control peak current of  $100 \pm 24$  pA ( $n = 8$ ), whereas 1.5% halothane produced  $70 \pm 4\%$  reduction from a control peak current of  $153 \pm 27$  pA ( $n = 7$ ). Isoflurane (2.6%) also produced  $55 \pm 5\%$  depression of  $I_{Ca}$  amplitude from the control peak current of  $105 \pm 14$  pA. At approximately equianesthetic concentrations,  $I_{Ca}$  suppression by 1.5% halothane was significantly greater than by 2.6% isoflurane at voltages positive to  $+10$  mV. The effects of volatile anesthetics were not voltage-dependent; *i.e.*, there was no shift in the current-voltage relationship.

## Discussion

Halothane and isoflurane have direct coronary vasodilatory effects *in vitro* and *in vivo*.<sup>25,26</sup> In *in vitro* preparations, halothane directly relaxes isolated coronary arterial rings previously constricted with  $K^+$  or prostanoid to a greater degree than does isoflurane.<sup>7</sup> This would suggest that halothane is a more potent suppressor than isoflurane of voltage-dependent  $Ca^{2+}$  entry, since voltage-gated  $Ca^{2+}$  influx is the mechanism underlying  $K^+$ -induced contractions.<sup>27</sup> In the *in vivo* setting, the mechanism for coronary flow increase during anesthesia likely involves complex interactions among endothelium, vascular smooth muscle, myocardium, and the autonomic nervous

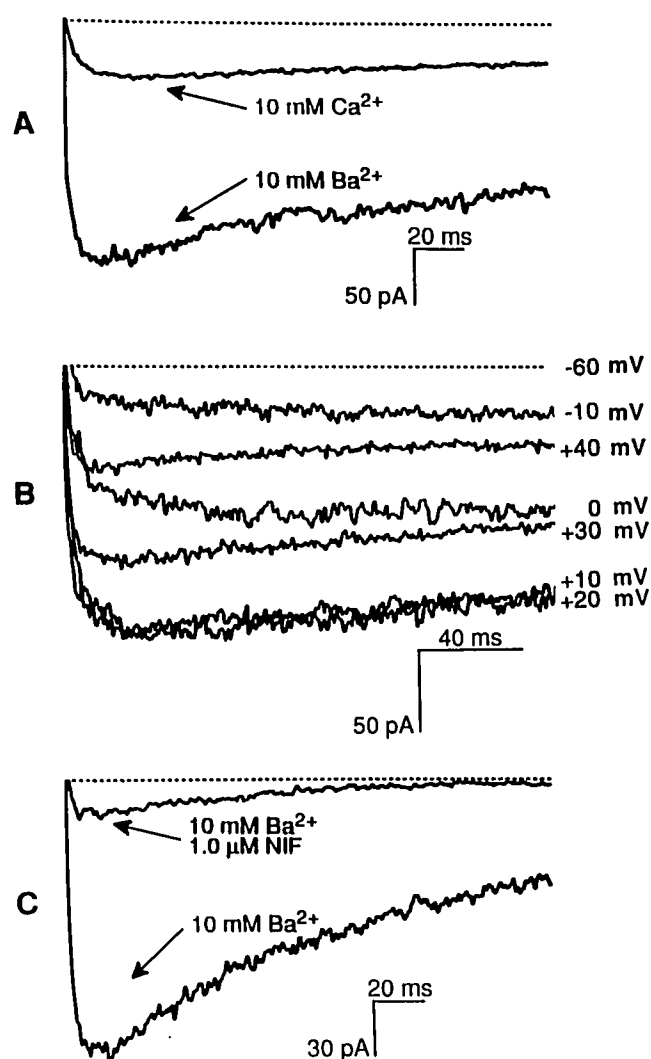

FIG. 5. Recordings of inward current in three arterial cells. *A*: The potentiating effect of 10 mM  $Ba^{2+}$  substitution for 10 mM  $Ca^{2+}$  on peak  $Ca^{2+}$  current ( $I_{Ca}$ ) elicited by a depolarizing pulse from  $-60$  mV to  $+20$  mV in an individual cell. *B*: Traces showing small inward current, voltage, and time-dependent inactivation of  $I_{Ca}$  in a single cell superfused with 10 mM  $Ba^{2+}$ . The cell was depolarized in 10-mV increments from holding potential of  $-60$  mV to voltages of up to  $+40$  mV. In this cell,  $I_{Ca}$  was activated at command potentials positive to  $-20$  mV. *C*: Effect of 1  $\mu M$  nifedipine (NIF) on peak  $I_{Ca}$  elicited by a depolarizing pulse from  $-60$  mV to  $+20$  mV. Peak  $I_{Ca}$  was almost completely blocked by 1  $\mu M$  nifedipine.

system. For example, in the intact circulation the direct effects of volatile anesthetics on arterial muscle<sup>7,25,26</sup> are superimposed on their dominant depressant action on the myocardium, namely a reduced cardiac work and oxygen demand.<sup>28</sup> In addition to these complex interactions, the effects of anesthetic agents on the coronary endothelium may regulate arterial diameter by modulating the synthesis and release of constricting and relaxing factors.<sup>14,15</sup> Muldoon and co-workers found that halothane attenuates

endothelium-induced vasodilation in dog coronary arteries.<sup>16</sup>

The halothane-induced vasorelaxation, as examined in intact rat aortic rings, is likely induced by a combination of events including decreased  $Ca^{2+}$  accumulation by the sarcoplasmic reticulum, decreased sensitivity of contractile proteins to  $Ca^{2+}$ ,<sup>10</sup> and/or decreased  $Ca^{2+}$  entry from extracellular space, as shown in the present study. In addition to these events, there is evidence that anesthetic agents directly alter other ionic fluxes at the vascular muscle membrane.<sup>17</sup> Halothane is more potent than isoflurane in reducing the amount of  $Ca^{2+}$  rapidly released from the sarcoplasmic reticulum in rat ventricular myocardium.<sup>29</sup> In cerebral arterial muscle, halothane caused depolarization despite simultaneous vascular relaxation, suggesting electromechanical uncoupling of membrane potential and vascular contraction.<sup>17</sup> This unusual action of halothane remains unexplained, but the authors suggested that an intracellular action of halothane or alteration of membrane ionic fluxes might be involved.

The purpose of the present study was to identify the actions of halothane and isoflurane on macroscopic  $I_K$  and  $I_{Ca}$  currents in the coronary arterial cell membrane. Our findings show that these volatile anesthetics reduce the amplitude of  $I_K$  and  $I_{Ca}$  in the vascular muscle membrane. However, these two channel types were not equally sensitive to block by halothane and isoflurane:  $I_{Ca}$  was blocked more effectively than  $I_K$ . These findings concur with previous voltage-clamp experiments performed in cardiac myocytes,<sup>18,19,30</sup> where halothane and isoflurane produced similar depression of L-type and transient (T-type)  $I_{Ca}$ <sup>30</sup> but less depression of delayed rectifier  $I_K$ .<sup>19</sup> Halothane was a more potent depressor of  $I_K$  and  $I_{Ca}$  than was isoflurane. These depressant effects of halothane and isoflurane on  $I_{Ca}$  persisted after terminating the anesthetics. This may explain the irreversible depressant effect of halothane on vascular contraction in isolated rat aortic rings, both *in vivo* and *in vitro*.<sup>31</sup> Because volatile anesthetics have widespread effects on  $Ca^{2+}$  translocation,<sup>3</sup> the mechanism for this effect is not readily apparent.

The macroscopic  $I_K$  measured in our study was 4-AP sensitive, and slowly inactivating. A 4-AP-sensitive, delayed-rectifier  $K^+$  channel also has been described in neuronal,<sup>32</sup> cardiac,<sup>33</sup> skeletal,<sup>34</sup> and vascular smooth muscle cells<sup>35</sup> and recently in coronary arterial cells.<sup>36</sup> In our study,  $I_K$  showed a whole-cell conductance slope of 18 nS. This represents a relatively high  $K^+$  conductance, compared with estimated slope conductance of 6 nS in cerebral arterial cells<sup>37</sup> and 7 nS in rabbit portal vein.<sup>38</sup> This efflux of  $K^+$  through these channels functions as an endogenous dilating mechanism and may play an important role in regulating coronary arterial tone.<sup>36</sup> Activation of membrane  $I_K$  causes cell hyperpolarization, rendering  $Ca^{2+}$  channels inactive and leading to vascular relaxation.<sup>39</sup> It

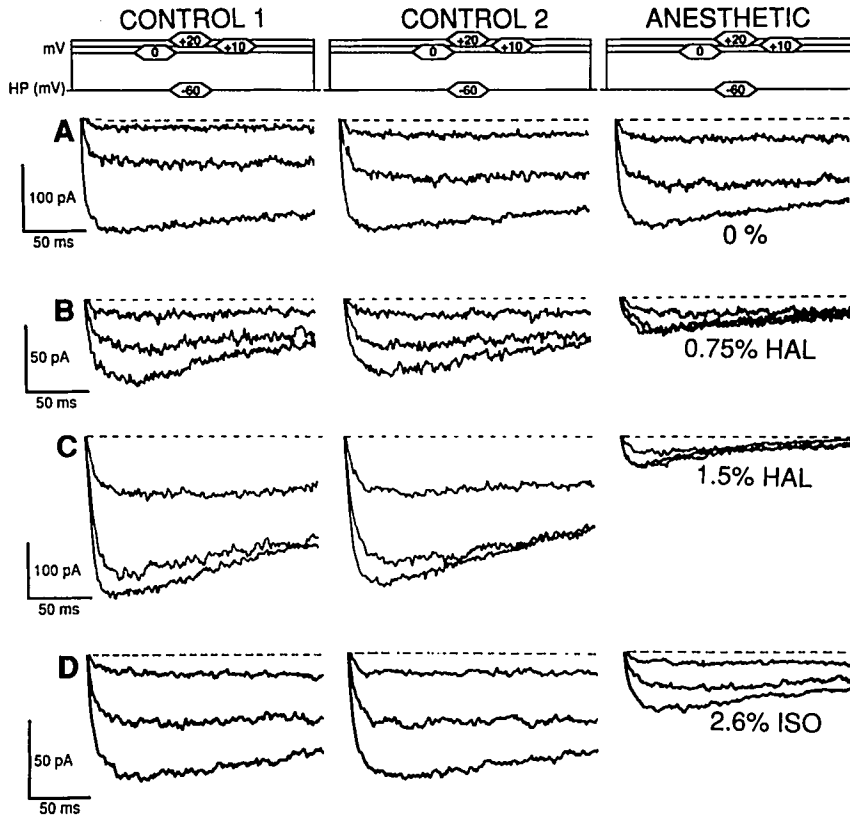

FIG. 6. Recordings of  $\text{Ca}^{2+}$  current ( $I_{\text{Ca}}$ ) generated by progressive depolarizing pulses from  $-60$  mV to  $+40$  mV ( $10$ -mV increments). Only selected episodes are shown:  $-60$  mV (dashed line) and  $0$ ,  $+10$ , and  $+20$  mV. A: Three measurements (control 1, control 2, and control 3) were taken 3 min apart without exposure to volatile anesthetics in order to determine time-dependent changes (decay) in  $I_{\text{Ca}}$ . B: In other cells, recordings of  $I_{\text{Ca}}$  were obtained in control solution (control 1, control 2) and then in the presence of  $0.75\%$  halothane,  $1.5\%$  halothane (C), or  $2.6\%$  isoflurane (D). Control measurements were taken 3 min apart, and measurements after anesthetic application were taken 3 min after control 2 in the same cell.

is estimated that the opening of only a few  $\text{K}^+$  channels can significantly hyperpolarize a vascular muscle cell. Moreover, opening of a single  $\text{K}^+$  channel could, by some calculations, hyperpolarize arterial cells from  $-55$  to  $-56.2$  mV.<sup>40</sup>

Two distinct  $\text{Ca}^{2+}$  channel types have been identified in vascular smooth muscle.<sup>24</sup> The T-type current activates at more negative membrane potentials and decays rapidly, whereas L-type current activates at more positive membrane potentials and decays slowly. The inward current

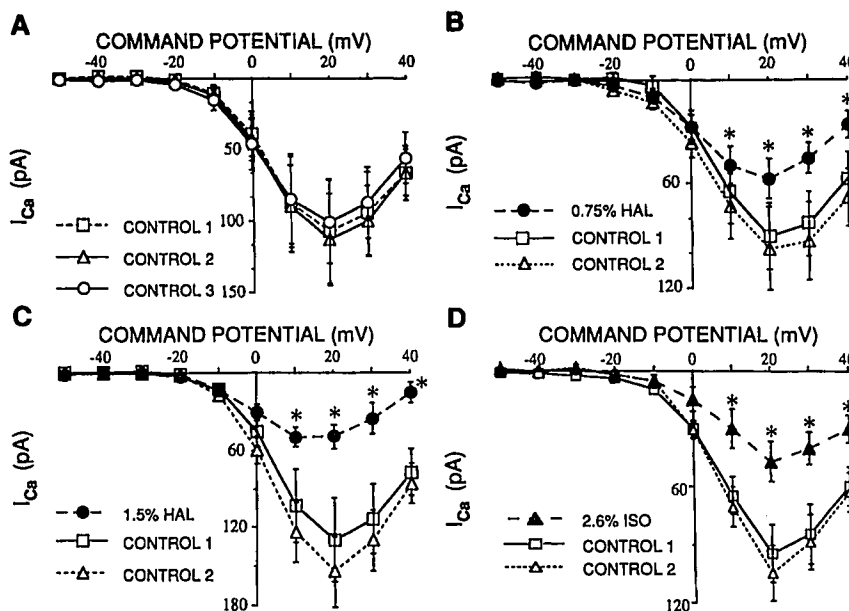

FIG. 7. The current-voltage relationships for  $\text{Ca}^{2+}$  current ( $I_{\text{Ca}}$ ) activation. A: Stable current-voltage relationship for  $I_{\text{Ca}}$  activation in three consecutive trials was confirmed in eight cells. B: The current-voltage relationship for  $I_{\text{Ca}}$  activation in control solution and in the presence of  $0.75\%$  halothane ( $n = 8$ ) or (C)  $1.5\%$  halothane ( $n = 7$ ). D: The effect of  $2.6\%$  isoflurane ( $n = 6$ ) on  $I_{\text{Ca}}$  at all voltages. Both halothane and isoflurane produced significant depression of  $I_{\text{Ca}}$ . \* $P \leq 0.05$  versus control 1 and control 2.

in this preparation resembled the L-type  $I_{Ca}$ . The high threshold for  $I_{Ca}$  activation, enhancement of  $I_{Ca}$  amplitude by equimolar substitution of  $Ba^{2+}$  for  $Ca^{2+}$ , and block by nifedipine are consistent with the voltage-dependent and pharmacologic properties of the L-type  $Ca^{2+}$  channel in vascular muscle.<sup>24,41</sup> The predominance of L-type channels in the coronary circulation has been suggested recently by a study in rabbit coronary arterial cells.<sup>42</sup>

The halothane and isoflurane-induced block of  $I_{Ca}$  may help to explain the direct dilatory effect of these anesthetics on vascular smooth muscle. The halothane-induced vasorelaxation is likely induced by a combination of events, including reduction of sensitivity of contractile proteins for  $Ca^{2+10}$  and reduction of  $Ca^{2+}$  influx. The depression of  $I_{Ca}$  by halothane and isoflurane may be particularly important in the coronary circulation, which relies predominantly on influx of external  $Ca^{2+}$  for maintenance of contraction.<sup>43</sup> Concomitantly to this depression of  $I_{Ca}$ , the volatile anesthetic-induced depression of  $I_K$  would favor membrane depolarization, because voltage-dependent  $I_K$  is crucial for membrane repolarization and control of arterial tone. While this membrane depolarization would favor increased  $Ca^{2+}$  influx, the simultaneous and direct depressant action of anesthetics on  $Ca^{2+}$  channels may reduce net voltage-dependent  $Ca^{2+}$  entry.

From our voltage-clamp data it is not possible to speculate on the molecular basis of the more potent block by halothane and isoflurane of  $Ca^{2+}$  as compared to  $I_K$ . The depressant effect of volatile anesthetics on whole-cell  $I_K$  and  $I_{Ca}$  were voltage-independent in this study, suggesting that halothane and isoflurane also likely reduce ionic currents at resting membrane potential in vascular muscle. Measurement of these events by the single-channel, patch-clamp method may provide more detailed information on the exact mechanism by which volatile anesthetics alter channel activity at more physiologic voltages, where net ionic flux is low. However, to judge from our data on macroscopic ionic currents, it is possible that the preferential depression of  $I_{Ca}$  by halothane and isoflurane may be one mechanism to reduce cytosolic  $Ca^{2+}$  levels in arterial cells during general anesthesia. In the intact coronary circulation, this membrane alteration may interact with the other actions of anesthetic agents to determine coronary arterial tone and modulate blood flow to the heart.

### References

1. Sprague DH, Yang JC, Ngai SH: Effects of isoflurane and halothane on contractility and the cyclic 3', 5'-adenosine monophosphate system in the rat aorta. *ANESTHESIOLOGY* 40:162-167, 1974
2. Longnecker DE, Harris PD: Microcirculatory actions of general anesthetics. *Fed Proc* 39:1580-1583, 1980
3. Altura BM, Altura BT, Carella A, Turlatpaty PDMV, Weinberg J: Vascular smooth muscle and general anesthetics. *Fed Proc* 39:1584-1591, 1980
4. Muldoon SM, VanHoutte PM, Lorenz RR, Van Dyke RA: Venomotor changes caused by halothane acting on the sympathetic nerves. *ANESTHESIOLOGY* 43:41-48, 1975
5. Seagard JL, Bosnjak ZJ, Hopp FA Jr., Kotrly KJ, Ebert TJ, Kampine JP: Cardiovascular effects of general anesthesia, *Effects of Anesthesia*. Edited by Covino BG, Fozzard HA, Rehder K, Stichtartz G. Bethesda, American Physiological Society, 1985, pp 149-177
6. Lunn JJ, Rorie DK: Halothane-induced changes in the release and disposition of norepinephrine at adrenergic nerve endings in dog saphenous vein. *ANESTHESIOLOGY* 61:377-384, 1984
7. Bollen BA, Tinker JH, Hermsmeyer K: Halothane relaxes previously constricted isolated porcine coronary artery segments more than isoflurane. *ANESTHESIOLOGY* 66:748-752, 1987
8. Ngai SH, Bolme P: Effects of anesthetics on circulatory regulatory mechanisms in the dog. *J Pharmacol Exp Ther* 153:495-504, 1966
9. Marijic J, Madden JA, Kampine JP, Bosnjak ZJ: The effect of halothane on norepinephrine responsiveness in rabbit small mesenteric veins. *ANESTHESIOLOGY* 73:479-484, 1990
10. Su JY, Zhang CC: Intracellular mechanisms of halothane's effect on isolated aortic strips of the rabbit. *ANESTHESIOLOGY* 71:409-417, 1989
11. Malinconico SM, McCarl RL: Effect of halothane on cardiac sarcoplasmic reticulum  $Ca^{2+}$ -ATPase at low calcium concentrations. *Mol Pharmacol* 22:8-10, 1982
12. Walter F, Vulliemoz Y, Verosky M, Triner L: Effects of halothane on the cyclic 3', 5'-adenosine monophosphate enzyme system in human platelets. *Anesth Analg* 59:856-861, 1962
13. Nakamura K, Hatano Y, Toda H, Mishiwada M, Baek W, Mori K: Halothane-induced relaxation of vascular smooth muscle: A possible contribution of increased cyclic GMP formation. *Jpn J Pharmacol* 55:165-168, 1991
14. Furchgott RF: The role of endothelium in the responses of vascular smooth muscle to drugs. *Ann Rev Pharmacol Toxicol* 24:175-197, 1984
15. Vanhoutte PM, Rubanyi GM, Miller VM, Houston DS: Modulation of vascular smooth muscle contraction by the endothelium. *Ann Rev Physiol* 48:307-320, 1986
16. Muldoon SM, Hart JL, Bowen KA, Freas W: Attenuation of endothelium-mediated vasodilation by halothane. *ANESTHESIOLOGY* 68:31-37, 1988
17. Harder DR, Graddall K, Madden JA, Kampine JP: Cellular actions of halothane on cat cerebral arterial muscle. *Stroke* 16:680-683, 1985
18. Bosnjak ZJ, Supan FD, Rusch NJ: The effects of halothane, enflurane, and isoflurane on calcium current in isolated canine ventricular cells. *ANESTHESIOLOGY* 74:340-345, 1991
19. Supan F, Buljubasic N, Eskinder H, Kampine JP, Bosnjak ZJ: Effects of halothane isoflurane and enflurane on  $K^+$  current in canine cardiac Purkinje cells. *Anesth Analg* 72:S286, 1991
20. Hamill OP, Marty A, Neher E, Sakmann B, Sigworth FJ: Improved patch-clamp techniques for high-resolution current recording from cells and cell-free membrane patches. *Pflugers Arch* 391:85-100, 1981
21. Mitra R, Morad M:  $Ca^{2+}$  and  $Ca^{2+}$ -activated  $K^+$  currents in mammalian gastric smooth muscle cells. *Science* 229:269-271, 1985
22. Singer JJ, Walsh JV: Characterization of calcium-activated potassium channels in single smooth muscle cells using the patch-clamp technique. *Pflugers Arch* 408:98-111, 1987
23. Sakmann B, Neher E: Patch-clamp techniques for studying ionic channels in excitable membranes. *Ann Rev Physiol* 46:458-472, 1984
24. Bean BP, Sturek M, Puga A, Hermsmeyer K: Calcium channels



- in muscle cells isolated from rat mesenteric arteries: Modulation by dihydropyridine drugs. *Circ Res* 59:229-235, 1986
25. Witzeling TM, Sill JC, Hughes JM, Blaise GA, Nugent M, Rorie DK: Isoflurane and halothane attenuate coronary artery constriction evoked by serotonin in isolated porcine vessels and in intact pigs. *ANESTHESIOLOGY* 73:100-108, 1990
  26. Larach DR, Schuler HG, Skeehan TM, Peterson CJ: Direct effects of myocardial depressant drugs on coronary vascular tone: Anesthetic vasodilation by halothane and isoflurane. *J Pharmacol Exp Ther* 254:58-64, 1990
  27. Haeusler G: Contraction, membrane potential, and calcium fluxes in rabbit pulmonary artery muscle. *Fed Proc* 42:263-268, 1983
  28. Stowe DF, Marjic J, Bosnjak ZJ, Kampine JP: Direct comparative effects of halothane, enflurane, and isoflurane on oxygen supply and demand in isolated hearts. *ANESTHESIOLOGY* 74:1087-1095, 1991
  29. Lynch C, Frazer MJ: Depressant effects of volatile anesthetics upon rat and amphibian ventricular myocardium: Insight into anesthetic mechanisms of action. *ANESTHESIOLOGY* 70:511-522, 1989
  30. Eskinder H, Rusch NJ, Supan FD, Kampine JP, Bosnjak ZJ: The effects of volatile anesthetics on L- and T-type calcium channel currents in canine cardiac Purkinje cells. *ANESTHESIOLOGY* 74: 919-926, 1991
  31. Spiss CK, Smith CM, Tsuimoto G, Hoffman BB, Maze M: Prolonged hyporesponsiveness of vascular smooth muscle contraction after halothane anesthesia in rabbits. *Anesth Analg* 64:1-6, 1985
  32. Yeh JH, Oxford GS, Wu CH, Narahashi T: Dynamics of aminopyridine block of potassium channels in squid axon membrane. *J Gen Physiol* 68:519-535, 1976
  33. Tseng GN, Hoffman BF: Two components of transient outward current in canine ventricular myocytes. *Circ Res* 64:633-647, 1989
  34. Gillespie G, Hutter OP: The actions of 4-aminopyridine on the delayed potassium current in skeletal muscle fibers. *J Physiol (Lond)* 252:70-71, 1975
  35. Okabe K, Kitimura K, Kuriyama H: Features of 4-aminopyridine sensitive outward current observed in single smooth muscle cells from the rabbit pulmonary artery. *Pflugers Arch* 409:561-568, 1987
  36. Inoue I, Nakaya Y, Nakaya S, Mori H: Extracellular  $Ca^{2+}$ -activated  $K^+$  channel in coronary artery smooth muscle cell and its role in vasodilation. *FEBS Lett* 255:281-284, 1989
  37. Bonnet P, Rusch NJ, Harder DR: Characterization of an outward  $K^+$  current in freshly dispersed cerebral arterial muscle cells. *Pflugers Arch* 418:292-296, 1991
  38. Beech DJ, Bolton TB: Two components of potassium current activated by depolarization of single smooth muscle cells from the rabbit portal vein. *J Physiol (Lond)* 418:293-309, 1989
  39. Wilde DW, Lee KS: Outward potassium currents in freshly isolated smooth muscle cell of dog coronary arteries. *Circ Res* 65:1718-1734, 1989
  40. Nelson MT, Patlak JB, Worley JF, Standen NB: Calcium channels, potassium channels and voltage dependence of arterial smooth muscle tone. *Am J Physiol* 259:C3-C18, 1990
  41. Loirand G, Pacaud P, Mironneau C, Mironneau J: Evidence for two distinct calcium channels in rat vascular smooth muscle cells in short-term primary culture. *Pflugers Arch* 407:566-568, 1986
  42. Matsuda JJ, Volk KA, Shibata EF: Calcium currents in isolated rabbit coronary arterial smooth muscle myocytes. *J Physiol (Lond)* 427:657-680, 1990
  43. Mullett M, Gharaibeh M, Warltier DC, Gross GJ: The effect of diltiazem, a calcium channel blocking agent, on vasoconstrictor responses to norepinephrine, serotonin and potassium depolarization in canine coronary and femoral arteries. *Gen Pharmacol* 14:259-264, 1983
